# Supplementary material for: Municipal Residence Level of Long-Term PM10 Exposure Associated with Obesity among Young Adults in Seoul, Korea
Source: Preprints.org preprint supplement (doi:10.20944/preprints202008.0629.v1), 2020-08-28
Supplement: Supplementary file 2 [file supplementary]

## Sheet: IJERPH_TS1
	Table S1. Associations between obesity and particulate matters according to specific residence period among young adults in Community Health Survey, Seoul, Korea, 2017
	Period of PM10 level1	Annual PM10 level median cut-off	Study population residence period (year)	Odds ratio (95% Confidence interval)2
				Age 19-29	Aged 19-24	Aged 25-29
	10 years (2008-2017)	47.2	10 years ≤	1.002 (0.905–1.110)	0.948 (0.846–1.063)	1.065 (0.933–1.215)
			10 ≤ R.P < 15	0.985 (0.858–1.130)	1.008 (0.876–1.160)	-
			15 ≤ R.P < 20	1.218 (1.019–1.455)	1.135 (0.931–1.383)	-
			20 years ≤	0.964 (0.858–1.083)	0.875 (0.768–0.998)	1.040 (0.908–1.192)
	15 years (2003-2017)	51.5	10 years ≤	1.048 (0.948–1.158)	1.040 (0.929–1.163)	1.039 (0.907–1.190)
			10 ≤ R.P < 15	0.966 (0.835–1.117)	0.901 (0.788–1.029)	-
			15 ≤ R.P < 20	1.033 (0.875–1.218)	1.027 (0.844–1.249)	-
			20 years ≤	1.081 (0.965–1.212)	1.115 (0.981–1.268)	1.043 (0.907–1.199)
	5 years (2001-2005)	68.7	10 years ≤	1.071 (0.969–1.185)	0.984 (0.879–1.102)	1.210 (1.057–1.386)
			10 ≤ R.P < 15	0.875 (0.759–1.009)	0.789 (0.682–0.914)	-
			15 ≤ R.P < 20	0.986 (0.826–1.177)	0.769 (0.630–0.939)	-
			20 years ≤	1.156 (1.032–1.294)	1.225 (1.078–1.394)	1.106 (0.965–1.268)
	5 years (2006-2010)	56.6	10 years ≤	0.895 (0.808–0.991)	0.943 (0.839–1.060)	0.823 (0.721–0.939)
			10 ≤ R.P < 15	0.706 (0.605–0.823)	0.597 (0.518–0.687)	-
			15 ≤ R.P < 20	1.079 (0.910–1.279)	1.211 (1.007–1.455)	-
			20 years ≤	0.891 (0.794–1.000)	0.951 (0.826–1.094)	0.827 (0.726–0.942)
	5 years (2011-2015)	46.2	10 years ≤	1.038 (0.938–1.149)	0.987 (0.880–1.106)	1.102 (0.966–1.256)
			10 ≤ R.P < 15	1.058 (0.922–1.214)	1.165 (1.013–1.338)	-
			15 ≤ R.P < 20	1.075 (0.904–1.279)	0.957 (0.796–1.149)	-
			20 years ≤	1.023 (0.913–1.147)	0.967 (0.846–1.106)	1.082 (0.946–1.238)
	1 Annual level of PM10 (μg/m3) was calibrated using hourly measured level of PM10 among 25 municipalities in Seoul between 2001 and 2017.
	2 Odds ratio was calculated with those who have obesity (overweight or obese BMI) against those with under or normal weight in survey logistic regression.
